# Supplementary material
Source: PubMed Central journal article supplement (PMC1323494)
Supplement: plntcell_tpc.105.037077_1.pdf [file plntcell_tpc.105.037077_1.pdf]

**Supplemental Table 1: Tocopherol content of transgenic *Arabidopsis* seed from the R3 generation.**

| Line                | Generation | Event #            | N  | Mean tocopherol levels * |       | Significance* |
|---------------------|------------|--------------------|----|--------------------------|-------|---------------|
|                     |            |                    |    | [ng/mg seed]             |       |               |
| WT + pMON69914      | R3         | <i>At</i> -S10154N | 12 | 477                      | ± 5.4 | A             |
| WT + pMON69914      | R3         | <i>At</i> -S10156N | 10 | 453                      | ± 5.9 | B             |
| WT + pMON69914      | R3         | <i>At</i> -S10160N | 12 | 461                      | ± 5.4 | A B           |
| WT + pMON69914      | R3         | <i>At</i> -S10168N | 12 | 469                      | ± 5.4 | A B           |
| WT + pMON69914      | R3         | <i>At</i> -S10177N | 8  | 454                      | ± 6.6 | A B           |
| WT + Vector Control | R3         | <i>At</i> -S10134N | 7  | 448                      | ± 7.0 | B             |

Abbreviations: \*, Means, standard error, and significance were calculated using Tukey-Kramer HSD, means followed by the same letters are not significantly different from each other ( $\alpha = 0.05$ ); *lt1*, low total tocopherol mutant 1; N, number of individual plants analyzed.
