# Supplementary material
Source: PubMed Central journal article supplement (PMC1323494)
Supplement: plntcell_tpc.105.037077_2.pdf [file plntcell_tpc.105.037077_2.pdf]

**Supplemental Table 2: LC/MS gradient for the separation of isoprenoid phosphates.**

|                   | <b>Gradient composition</b> |            |            |            |
|-------------------|-----------------------------|------------|------------|------------|
| <b>Time [min]</b> | <b>% A</b>                  | <b>% B</b> | <b>% C</b> | <b>% D</b> |
| 0.0               | 95                          | 2          | 3          | 0          |
| 0.3               | 95                          | 2          | 3          | 0          |
| 0.5               | 93                          | 2          | 0          | 5          |
| 1.4               | 55                          | 40         | 0          | 5          |
| 2.2               | 40                          | 55         | 0          | 5          |
| 2.5               | 0                           | 95         | 0          | 5          |
| 3.0               | 0                           | 95         | 0          | 5          |
| 3.1               | 0                           | 99         | 0          | 1          |
| 3.6               | 0                           | 99         | 0          | 1          |
| 3.7               | 95                          | 2          | 3          | 0          |
| 7.0               | 95                          | 2          | 3          | 0          |

See Methods for details.
